# Supplementary material for: Early emergence of sexual dimorphism in offspring leukocyte telomere length was associated with maternal and children’s glucose metabolism—a longitudinal study
Source: PubMed Central journal article supplement (PMC9764638; doi:10.1186/s12916-022-02687-5), 2022-12-20
Supplement: 12916_2022_2687_MOESM1_ESM.pdf [file 12916_2022_2687_MOESM1_ESM.pdf]

Male

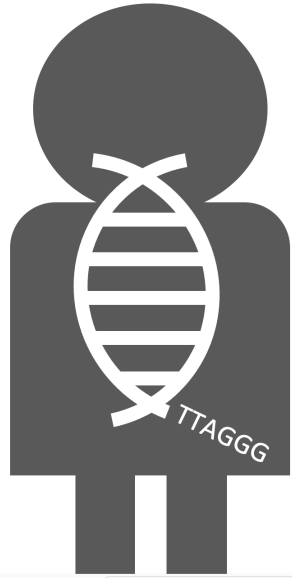

VS

Female

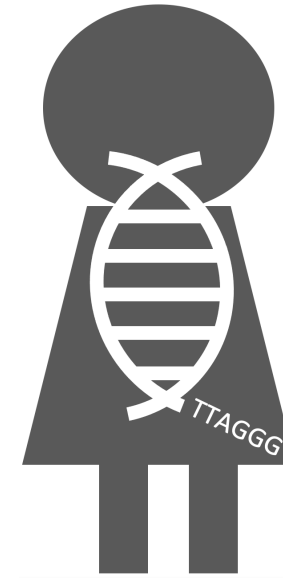

$\beta = 0.067, p = 0.005$

$\beta = 0.075, p = 0.002$

$\beta = 0.072, p = 0.002$

$\beta = -0.008, p = 0.734$

$\beta = -0.032, p = 0.184$

1 hr-OGTT glucose

2 hr-OGTT glucose

GAUC

Insulinogenic index 30

Matsuda index

$\beta = 0.005, p = 0.839$

$\beta = 0.037, p = 0.114$

$\beta = 0.023, p = 0.331$

$\beta = -0.06, p = 0.012$

$\beta = 0.073, p = 0.002$

#All associations shown with SE +/- 0.023-0.024, and has been fully adjusted with children's age, prenatal and parental effects.
